# Supplementary material
Source: PubMed Central journal article supplement (PMC2689767)
Supplement: M800365-MCP200_1.pdf [file M800365-MCP200_1.pdf]

# Supplemental Data 1

## Supplemental Methods

**Purification of bovine  $\beta$ -trypsin** — Bovine  $\beta$ -trypsin was purified from a commercial TPCK treated product by chromatography on soybean trypsin inhibitor-immobilized agarose with pH-step gradient elution to separate  $\alpha$ - and  $\beta$ -forms of the enzyme (1, 2). Purified  $\beta$ -trypsin was stored in 1 mM HCl containing 10 mM  $\text{CaCl}_2$ . The  $\beta$ -trypsin concentrations was determined from the absorbance at 280 nm using the absorption coefficient of  $1.54 \text{ L}^{-1}\cdot\text{g}^{-1}\cdot\text{cm}^{-1}$  and molecular weight of 23,900 (1).

**Gel electrophoresis** — Sodium dodecyl sulfate polyacrylamide gel electrophoresis (SDS-PAGE) was performed in a 10% gel as described previously (3). Prior to SDS-PAGE, samples were boiled for 5 min in loading buffer containing 2% SDS, and in the presence or absent of reducing reagent. The gels were visualized by staining with Coomassie Brilliant Blue.

**Preparation of immobilized pepsin column** — Pepsin-immobilized column was prepared according to the method described previously (4). Pepsin was immobilized on POROS-20AL support through the formation and reducing of Schiff's base with pepsin. The immobilized

pepsin was packed in clean stainless steel columns (2 mm × 50 mm: Alltech) using AKTA explorer 100 system until back pressure reached 12 MPa. To remove the peptic peptides produced by autolysis among immobilized pepsins, additional extensive pumping was performed with 0.1% formic acid at room temperature until UV absorbance at 215 nm did not decrease further.

**LC and ESI-MS spectrometry** – The LC/MS (liquid chromatography and mass spectrometry) system for H/D-EX experiment contained two Agilent LC pumps, a sample injector, 10-ports valve, immobilized-pepsin column, C18-Trap column (Zorbax C18, 5×0.3 mm, 5 μm), and analytical C18 column (Magic C18, 3×50 mm, 5 μm). The injection valve, sample loop (100 μl), and all the columns were submerged in a 0~4 °C ice bath containing 10% of ethanol (Fig. S3). In order to achieve better ionization and sensitivity, peptides were eluted and ionized through post-splitting (1: 19) to a tapered micro electrospray emitter. Finnigan LTQ linear ion-trap mass spectrometer was alternatively used to obtain ultra-zoom scan spectra (MS) or tandem mass spectra (MS2) with acquisition method in which MS survey scan from 350 to 1,500 m/z is followed by ultra-zoom scan spectra (10 m/z of precursor window) or tandem mass spectra (2 m/z of precursor window) for 15 min-data acquisition. Dynamic exclusion was used with 12 sec of duration and 8 m/z of mass window. Several air contaminant ions (371.0, 391.50,

436.10, 445.20, 462.10, 536.10, and 610.10 m/z) were rejected with a window (low = 1.2, high = 3.2) from precursor ion lists. Tandem mass spectra were acquired with 30% of normalized collision energy. Ultra-zoom scans with 15-points smoothed data were further used for the calculation of average mass.

## References

1. Robinson, NC, Tye, RW, Neurath, H, & Walsh, KA (1971) Isolation of trypsins by affinity chromatography. *Biochemistry* **10**: 2743-2747
2. Yung, BY & Trowbridge, CG (1980) A calorimetric comparison of trypsin and its anhydro modification in complex formation with Kunitz soybean inhibitor. *J Biol Chem* **255**: 9724-9730
3. Laemmli, UK (1970) Cleavage of structural proteins during the assembly of the head of bacteriophage T4. *Nature* **227**: 680-685
4. Wang, L, Pan, H, & Smith, DL (2002) Hydrogen exchange-mass spectrometry: optimization of digestion conditions. *Mol Cell Proteomics* **1**: 132-138

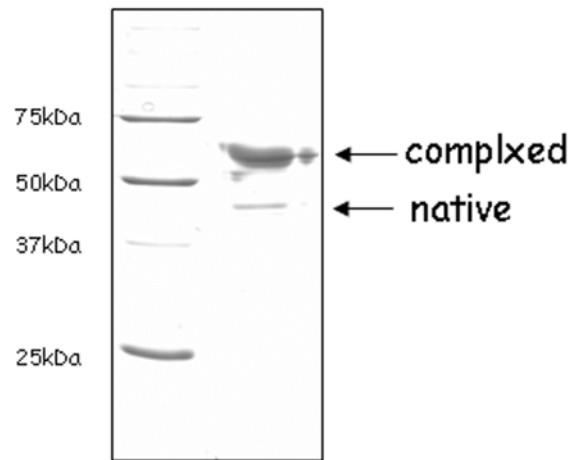

**Supplemental Fig. 1. SDS-PAGE of  $\alpha_1$ AT complexed with  $\beta$ -trypsin.** Complex formation of  $\alpha_1$ AT was achieved with  $\beta$ -trypsin purified by step-gradient at pH 3.2 from soybean trypsin inhibitor column. Mixture of  $\alpha_1$ AT and purified  $\beta$ -trypsin were incubated ( $\alpha_1$ AT: active  $\beta$ -trypsin = 1:1) for 10 min in 20mM phosphate buffer (pD 7.0) at 25 °C. The  $\alpha_1$ AT- $\beta$ -trypsin complex was analyzed on a nonreducing gel: (*left lane*) size markers; (*right lane*)  $\alpha_1$ AT- $\beta$ -trypsin complex.

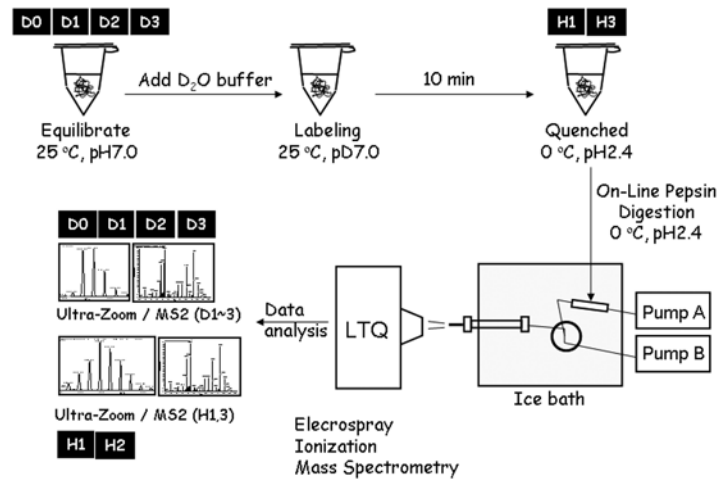

**Supplemental Fig. 2. Overview of HD-EX coupled mass spectrometric analysis with on-line pepsin column.** H1 indicates native form of  $\alpha_1$ AT and H3 indicates  $\alpha_1$ AT- $\beta$ -trypsin complex in H<sub>2</sub>O. D series (D0-D3) indicate deuterated samples in D<sub>2</sub>O buffer. D0 is a fully deuterated  $\alpha_1$ AT in 7M urea-D4 (D<sub>2</sub>NCOND<sub>2</sub>) buffer (pD 8.0); D1 is deuterated native form of  $\alpha_1$ AT; D2 is  $\alpha_1$ AT deuterated during the complex formation with  $\beta$ -trypsin; and D3 is  $\alpha_1$ AT- $\beta$ -trypsin complex deuterated for 10 min at 25 °C in D<sub>2</sub>O buffer. The final deuterium content was 91.6% in all the samples.

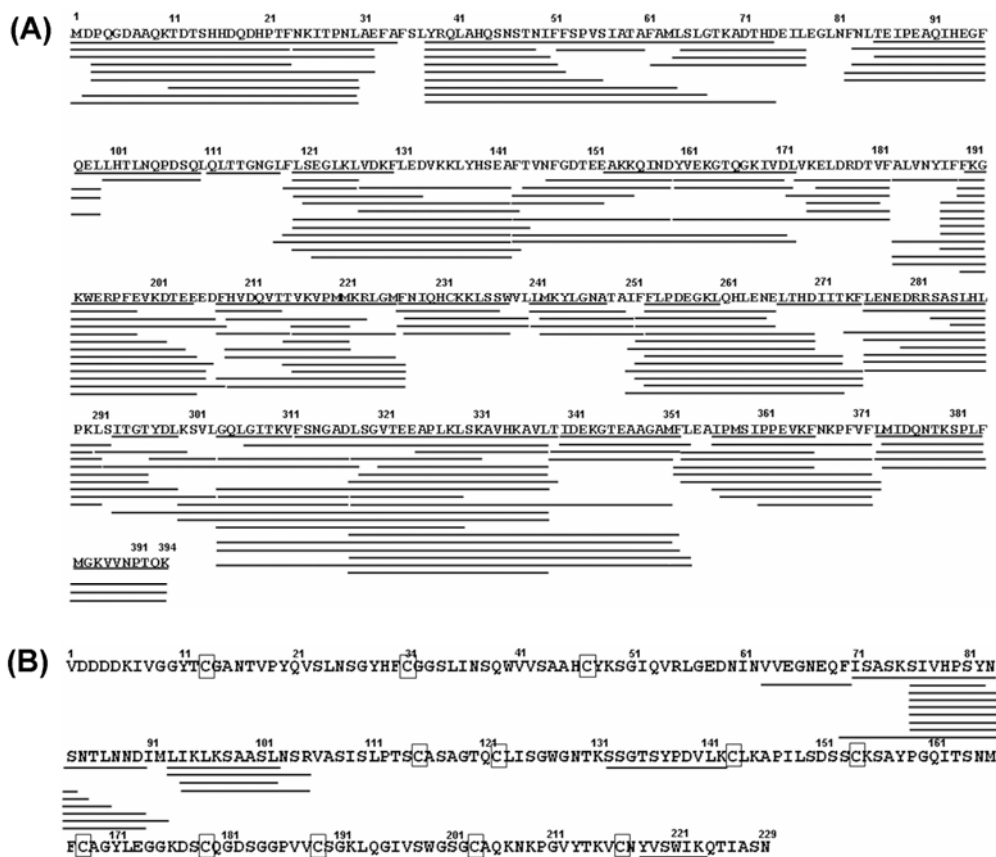

**Supplemental Fig. 3. Sequence coverage of (A)  $\alpha_1$ AT and (B)  $\beta$ -trypsin.** The lines indicate peptide fragments generated by using on-line pepsin immobilized column. The boxes in trypsin sequence indicate cysteine residues participating disulfide bond formation. Tandem mass spectrometry of the native (H1) and complexed  $\alpha_1$ AT (H3) in H<sub>2</sub>O identified 169 overlapping peptic fragments of  $\alpha_1$ AT (98.2% coverage) and 16 peptic fragments (26.2% coverage) of  $\beta$ -trypsin. On-line digestion by immobilized-pepsin column was successfully accomplished for all the samples (H1, H2, D1, D2, and D3) but digestion patterns were not exactly identical among different samples.
