# Supplementary material
Source: PubMed Central journal article supplement (PMC2689767)
Supplement: M800365-MCP200_2.pdf [file M800365-MCP200_2.pdf]

**Supplemental Table 1 Properties of measured 39 peptic fragments of  $\alpha_1$ AT in H/D-EX**

| Region <sup>a</sup> | Position | Peptide                          | Xcorr <sup>b</sup> | RT <sup>c</sup> | z | N <sup>d</sup> | Theoretical m/z & mass |                         |                         |                          | Observed m/z (average) |       |               |       |               |       |               |       | Exchanged deuterium content (ea) |       |                 |       |      | Exchanged deuterium content (%) |      |       |                        |              | D2-specific H/D-EX |              |      | Group <sup>h</sup> |              |                 |                 |                             |
|---------------------|----------|----------------------------------|--------------------|-----------------|---|----------------|------------------------|-------------------------|-------------------------|--------------------------|------------------------|-------|---------------|-------|---------------|-------|---------------|-------|----------------------------------|-------|-----------------|-------|------|---------------------------------|------|-------|------------------------|--------------|--------------------|--------------|------|--------------------|--------------|-----------------|-----------------|-----------------------------|
|                     |          |                                  |                    |                 |   |                | D <sub>0%</sub><br>m/z | D <sub>max</sub><br>m/z | D <sub>0%</sub><br>mass | D <sub>max</sub><br>mass | H1<br>(2runs)          | stdev | D1<br>(2runs) | stdev | D2<br>(2runs) | stdev | D3<br>(2runs) | stdev | D0<br>(2runs)                    | stdev | D1 <sup>e</sup> | stdev | D2   | stdev                           | D3   | stdev | D1<br>(%) <sup>f</sup> | stdev<br>(%) | D2<br>(%)          | stdev<br>(%) | D3   |                    | stdev<br>(%) | D2(%)<br>-D1(%) | D2(%)<br>-D3(%) | Average<br>(%) <sup>g</sup> |
|                     |          |                                  |                    |                 |   |                |                        |                         |                         |                          |                        |       |               |       |               |       |               |       |                                  |       |                 |       |      |                                 |      |       |                        |              |                    |              |      |                    |              |                 |                 |                             |
| N-term              | 1-23     | MDPQGDAAQKTDTSHHDDQDHPHF         | 2.50               | 4.74            | 3 | 20             | 860.9                  | 867.6                   | 2579.7                  | 2599.7                   | 860.9                  | 0.0   | 863.7         | 0.5   | 864.5         | 0.0   | 864.3         | 0.2   | 864.9                            | 0.2   | 13.8            | 2.7   | 17.8 | 0.1                             | 16.9 | 1.1   | 68.9                   | 13.6         | 89.0               | 0.3          | 84.3 | 5.7                | 20.1         | 4.7             | 12.4            | A                           |
| N-term              | 1-30     | MDPQGDAAQKTDTSHHDDQDHPFHNKIPNL   | 3.28               | 5.53            | 3 | 26             | 1121.2                 | 1129.7                  | 3360.6                  | 3386.6                   | 1121.1                 | 0.0   | 1124.7        | 0.4   | 1125.3        | 0.2   | 1123.8        | 0.6   | 1126.1                           | 0.2   | 18.4            | 1.9   | 21.9 | 0.8                             | 13.5 | 3.0   | 70.8                   | 7.3          | 84.1               | 3.2          | 52.0 | 11.6               | 13.3         | 32.1            | 22.7            | A                           |
| N-term-hA*          | 1-32     | MDPQGDAAQKTDTSHHDDQDHPFHNKIPNLAE | 4.08               | 5.74            | 3 | 28             | 1187.9                 | 1197.2                  | 3560.7                  | 3588.7                   | 1187.9                 | 0.1   | 1192.0        | 0.5   | 1192.8        | 0.2   | 1191.8        | 0.1   | 1193.5                           | 0.4   | 20.6            | 2.5   | 24.8 | 1.1                             | 19.5 | 0.3   | 73.5                   | 9.0          | 88.5               | 4.1          | 69.7 | 1.1                | 15.0         | 18.8            | 16.9            | A                           |
| hA                  | 24-32    | NKIPNLAE                         | 3.02               | 4.81            | 2 | 7              | 500.5                  | 503.6                   | 999.0                   | 1006.0                   | 500.5                  | ND    | 502.6         | 0.1   | 502.8         | 0.1   | 502.3         | 0.4   | 503.1                            | 0.2   | 5.7             | 0.3   | 6.3  | 0.3                             | 5.0  | 1.0   | 81.4                   | 3.6          | 89.3               | 4.4          | 71.7 | 14.0               | 7.9          | 17.7            | 12.8            | A                           |
| hA-s6B*             | 38-51    | YRQLAHQSNSTNIF                   | 3.74               | 5.63            | 2 | 13             | 840.4                  | 846.9                   | 1678.8                  | 1691.8                   | 840.3                  | 0.1   | 842.5         | 0.3   | 843.6         | 0.4   | 842.7         | 0.1   | 844.8                            | 0.6   | 6.2             | 0.8   | 9.3  | 1.3                             | 6.8  | 0.4   | 47.5                   | 6.3          | 71.9               | 9.9          | 52.2 | 3.1                | 24.4         | 19.6            | 22.0            | A                           |
| hB*                 | 52-60    | FSPVSIATA                        | 1.87               | 7.38            | 1 | 7              | 893.0                  | 900.0                   | 899.0                   | 899.0                    | 892.9                  | 0.0   | 893.4         | 0.1   | 893.1         | 0.1   | 893.1         | 0.1   | 898.0                            | 0.0   | 0.5             | 0.2   | 0.2  | 0.1                             | 0.1  | 0.1   | 7.6                    | 2.8          | 2.4                | 2.0          | 2.0  | 2.0                | -5.2         | 0.4             | -               | B                           |
| hB-hC               | 64-77    | SLGTGKADTHDEIL                   | 3.06               | 5.11            | 2 | 12             | 700.8                  | 706.8                   | 1399.5                  | 1411.5                   | 700.8                  | 0.1   | 702.3         | 0.0   | 702.4         | 0.1   | 702.6         | 0.1   | 704.2                            | 0.5   | 5.5             | 0.1   | 5.8  | 0.3                             | 6.3  | 0.4   | 45.7                   | 1.1          | 48.1               | 2.0          | 52.3 | 3.7                | 2.5          | -4.2            | -               | B                           |
| hB-hC*              | 65-77    | LSLGTGKADTHDEIL                  | 3.24               | 6.56            | 2 | 13             | 757.3                  | 763.8                   | 1512.7                  | 1525.7                   | 757.3                  | 0.1   | 758.6         | 0.1   | 758.8         | 0.1   | 758.7         | 0.0   | 760.6                            | 0.4   | 4.9             | 0.4   | 5.7  | 0.4                             | 5.4  | 0.2   | 37.3                   | 3.0          | 44.0               | 3.0          | 41.9 | 1.3                | 6.7          | 2.1             | 4.4             | B                           |
| hC1-hD              | 82-96    | FNLTPEPAQIHGEFG                  | 4.69               | 9.26            | 2 | 13             | 873.5                  | 879.9                   | 1744.9                  | 1757.9                   | 873.4                  | 0.0   | 876.2         | 0.0   | 876.5         | 0.0   | 876.4         | 0.0   | 877.9                            | 0.2   | 8.1             | 0.1   | 8.8  | 0.0                             | 8.6  | ND    | 62.1                   | 0.8          | 67.9               | 0.3          | 66.5 | ND                 | 5.8          | 1.4             | 3.6             | B                           |
| hC1-hD*             | 83-99    | NLTPEPAQIHGEFGQEL                | 4.72               | 9.02            | 2 | 15             | 985.1                  | 992.5                   | 1968.1                  | 1983.1                   | 985.0                  | 0.0   | 988.5         | 0.0   | 988.4         | 0.2   | 988.3         | 0.4   | 991.2                            | 0.2   | 8.5             | 0.1   | 8.2  | 0.5                             | 8.1  | 0.9   | 56.4                   | 0.7          | 54.4               | 3.1          | 53.7 | 6.1                | -2.1         | 0.7             | -               | B                           |
| s2A-hE-s1A*         | 120-142  | LSEGLKLVDFLEDVKLYHSEA            | 4.93               | 9.45            | 4 | 22             | 666.5                  | 672.4                   | 2662.1                  | 2684.1                   | 666.5                  | 0.0   | 667.4         | ND    | 668.9         | 0.1   | 668.9         | 0.2   | 670.8                            | 0.1   | 4.5             | ND    | 12.2 | 0.3                             | 12.1 | 1.2   | 20.6                   | ND           | 55.5               | 1.5          | 55.1 | 5.3                | 34.9         | 0.4             | -               | D                           |
| s1A-hF*             | 143-159  | FTVNFQDTEEAQQIND                 | 4.23               | 7.83            | 2 | 16             | 979.0                  | 986.9                   | 1956.0                  | 1972.0                   | 978.8                  | 0.0   | 982.2         | 0.1   | 982.3         | 0.1   | 981.9         | 0.2   | 984.6                            | 0.5   | 9.2             | 0.4   | 9.5  | 0.3                             | 8.2  | 0.7   | 57.5                   | 2.5          | 59.6               | 1.9          | 51.4 | 4.3                | 2.1          | 8.1             | 4.9             | B                           |
| hF-thFs3A           | 160-171  | YVEKGTQKQIVD                     | 3.14               | 4.63            | 2 | 11             | 669.3                  | 674.8                   | 1336.5                  | 1347.5                   | 669.2                  | 0.0   | 672.2         | 0.3   | 672.6         | 0.0   | 672.3         | 0.0   | 673.1                            | 0.1   | 8.4             | 1.0   | 9.7  | 0.1                             | 8.9  | ND    | 76.6                   | 9.1          | 88.2               | 1.3          | 80.8 | ND                 | 11.6         | 7.4             | 9.5             | A                           |
| hF-thFs3A*          | 160-172  | YVEKGTQKQIVDL                    | 2.68               | 5.22            | 2 | 12             | 725.8                  | 731.8                   | 1449.7                  | 1461.7                   | 725.8                  | 0.0   | 728.9         | 0.2   | 729.3         | 0.1   | 729.1         | 0.1   | 730.0                            | 0.3   | 9.0             | 0.7   | 10.2 | 0.2                             | 9.5  | 0.3   | 75.1                   | 5.5          | 85.0               | 1.9          | 79.0 | 2.6                | 9.9          | 6.0             | 7.9             | A                           |
| thFs3A*             | 172-182  | LVKELDRDRTVF                     | 2.41               | 6.53            | 2 | 10             | 668.3                  | 673.3                   | 1334.5                  | 1344.5                   | 668.3                  | 0.1   | 670.9         | 0.1   | 671.1         | 0.1   | 670.7         | 0.1   | 671.4                            | 0.1   | 8.3             | 0.3   | 9.0  | 0.2                             | 7.8  | 0.3   | 82.9                   | 3.2          | 89.6               | 2.3          | 77.7 | 3.0                | 6.7          | 11.9            | 9.3             | A                           |
| thFs3A              | 173-182  | VKELDRDRTVF                      | 2.54               | 5.87            | 2 | 9              | 611.7                  | 616.1                   | 1221.4                  | 1230.4                   | 611.7                  | ND    | 614.1         | 0.1   | 614.3         | 0.0   | 613.8         | 0.1   | 614.7                            | 0.3   | 7.1             | 0.3   | 7.7  | 0.1                             | 6.3  | 0.3   | 79.3                   | 2.8          | 85.7               | 1.6          | 70.3 | 2.8                | 6.4          | 15.4            | 10.9            | A                           |
| s3A*                | 183-189  | ALVNYIF                          | 1.83               | 9.11            | 1 | 6              | 840.0                  | 845.3                   | 839.0                   | 845.0                    | 839.8                  | 0.0   | 840.3         | 0.4   | 840.0         | 0.0   | 840.0         | ND    | 843.8                            | 0.4   | 0.4             | 0.6   | 0.0  | 0.0                             | 0.0  | ND    | 7.3                    | 9.5          | 0.0                | 0.6          | 0.0  | ND                 | 7.3          | 0.0             | -               | B                           |
| s3A-s4C             | 183-205  | ALVNYIFKQWVERPEVKDTEE            | 2.30               | 8.80            | 4 | 21             | 712.6                  | 718.8                   | 2846.2                  | 2867.2                   | 712.5                  | ND    | 714.4         | 0.1   | 715.0         | 0.0   | 714.4         | 0.0   | 716.6                            | 0.1   | 9.7             | 0.4   | 12.5 | 0.0                             | 9.8  | 0.3   | 46.4                   | 1.9          | 59.7               | 0.0          | 46.8 | 1.2                | 13.3         | 12.9            | 13.1            | A                           |
| s3A-s4C*            | 190-205  | FKGKWERPEVKDTEE                  | 3.96               | 5.39            | 3 | 14             | 676.1                  | 680.8                   | 2025.2                  | 2039.2                   | 676.1                  | 0.0   | 678.3         | 0.1   | 678.7         | 0.0   | 678.1         | 0.1   | 678.8                            | 0.4   | 11.1            | 0.3   | 13.5 | 0.1                             | 10.1 | 0.5   | 79.1                   | 2.2          | 96.2               | 1.0          | 72.0 | 3.7                | 17.1         | 24.2            | 20.7            | A                           |
| s4C-s3C*            | 208-227  | FHVQVTTVKVPMKRLGMF               | 4.42               | 8.91            | 4 | 18             | 592.2                  | 596.5                   | 2364.9                  | 2382.9                   | 592.2                  | ND    | 593.8         | 0.2   | 593.8         | 0.1   | 593.7         | 0.3   | 595.6                            | 0.5   | 8.1             | 0.9   | 8.2  | 0.5                             | 8.0  | 1.6   | 44.8                   | 5.0          | 45.5               | 2.7          | 44.2 | 8.7                | 0.7          | 1.3             | 1.0             | B                           |
| s4C-s3C             | 209-226  | HVDQVTTVKVPMKRLGM                | 4.99               | 8.40            | 4 | 16             | 518.7                  | 522.4                   | 2070.6                  | 2086.6                   | 518.5                  | ND    | 520.1         | 0.2   | 520.2         | 0.1   | 520.1         | 0.0   | 521.8                            | 0.3   | 7.4             | 0.8   | 7.7  | 0.7                             | 7.4  | 0.2   | 46.2                   | 5.0          | 48.1               | 4.5          | 46.3 | 1.1                | 1.9          | 1.8             | 1.8             | B                           |
| s4C-s3C             | 209-227  | HVDQVTTVKVPMKRLGMF               | 4.72               | 8.73            | 3 | 17             | 740.3                  | 745.9                   | 2217.8                  | 2234.8                   | 740.3                  | 0.0   | 742.0         | 0.2   | 742.1         | 0.1   | 741.8         | 0.0   | 744.0                            | 0.4   | 7.8             | 0.9   | 8.3  | 0.3                             | 7.1  | 0.2   | 46.0                   | 5.1          | 48.8               | 1.9          | 41.8 | 0.9                | 2.8          | 7.0             | 4.9             | B                           |
| s3C                 | 216-226  | VKVPMMKRLGM                      | 2.09               | 7.53            | 3 | 9              | 430.9                  | 433.8                   | 1289.8                  | 1298.8                   | 430.8                  | ND    | 431.7         | 0.3   | 431.6         | 0.0   | 431.5         | 0.2   | 432.8                            | 0.2   | 3.8             | 1.5   | 3.1  | 0.2                             | 2.7  | 0.8   | 42.3                   | 16.9         | 34.0               | 2.3          | 29.9 | 8.8                | -8.2         | 4.1             | -               | C                           |
| s1B-s2B*            | 227-238  | FNIQHCKKLSGW                     | 3.80               | 8.05            | 3 | 11             | 497.9                  | 501.6                   | 1490.8                  | 1501.8                   | 497.9                  | ND    | 498.6         | 0.3   | 498.6         | 0.2   | 498.4         | 0.0   | 500.1                            | 0.7   | 3.5             | 1.4   | 3.4  | 0.9                             | 2.6  | 0.2   | 31.7                   | 12.6         | 30.8               | 8.1          | 23.8 | 1.5                | -0.9         | 6.9             | 3.0             | B                           |
| s2B-s3B             | 241-251  | LMKYLGNATAI                      | 2.32               | 7.96            | 2 | 10             | 598.2                  | 603.2                   | 1194.5                  | 1204.5                   | 598.2                  | ND    | 599.6         | 0.0   | 599.7         | 0.7   | 599.4         | 0.2   | 601.3                            | 0.3   | 4.4             | 0.0   | 4.6  | 2.4                             | 3.7  | 0.8   | 44.3                   | 0.0          | 46.4               | 24.2         | 36.6 | 7.6                | 2.1          | 9.8             | 5.9             | A                           |
| s2B-s3B*            | 242-251  | MKYLGNATAI                       | 1.75               | 6.20            | 2 | 9              | 541.7                  | 546.2                   | 1081.3                  | 1090.3                   | 541.9                  | ND    | 543.0         | 0.0   | 543.4         | 0.0   | 543.0         | 0.1   | 544.8                            | ND    | 3.9             | 0.1   | 5.0  | 0.1                             | 3.8  | 0.3   | 43.2                   | 0.9          | 55.0               | 0.7          | 42.1 | 3.0                | 11.8         | 12.9            | 12.3            | A                           |
| s3B-hG*             | 253-266  | FLPDEGLQHLENE                    | 4.05               | 6.75            | 2 | 12             | 835.4                  | 841.3                   | 1668.8                  | 1680.8                   | 835.4                  | 0.1   | 837.5         | 0.2   | 837.9         | ND    | 837.8         | ND    | 839.1                            | 0.0   | 6.7             | 0.6   | 8.1  | ND                              | 7.9  | ND    | 56.0                   | 5.4          | 67.2               | ND           | 65.8 | ND                 | 11.2         | 1.4             | 6.3             | A                           |
| hH*                 | 267-275  | LTHDITIF                         | 3.22               | 6.20            | 2 | 8              | 544.6                  | 548.5                   | 1087.3                  | 1095.3                   | 544.6                  | ND    | 545.7         | 0.0   | 545.5         | 0.0   | 545.4         | ND    | 546.5                            | ND    | 4.4             | 0.1   | 3.8  | 0.0                             | 3.0  | ND    | 55.0                   | 1.9          | 47.6               | 0.4          | 37.9 | ND                 | -7.4         | 9.7             | -               | C                           |
| hH-s2C*             | 276-291  | LENEDRRASLHLPKL                  | 2.46               | 7.66            | 3 | 14             | 627.0                  | 631.7                   | 1878.1                  | 1892.1                   | 627.0                  | 0.0   | 628.0         | 0.4   | 627.9         | 0.0   | 627.7         | ND    | 629.5                            | 0.4   | 5.4             | 2.1   | 4.7  | 0.3                             | 3.5  | ND    | 38.5                   | 14.9         | 33.4               | 2.0          | 24.7 | ND                 | -5.1         | 8.7             | -               | C                           |
| hH-s6A              | 276-296  | LENEDRRASLHLPKLSITGT             | 3.14               | 8.34            | 4 | 19             | 585.4                  | 590.2                   | 2337.6                  | 2356.6                   | 585.5                  | 0.0   | 586.8         | 0.3   | 586.9         | 0.1   | 586.6         | 0.3   | 588.5                            | ND    | 8.7             | 1.8   | 9.2  | 0.6                             | 7.3  | 1.7   | 46.0                   | 9.7          | 48.5               | 3.0          | 38.7 | 9.0                | 2.4          | 9.8             | 6.1             | A                           |
| s6A*                | 291-300  | LSITGYDLK                        | 2.98               | 6.68            | 2 | 9              | 556.1                  | 560.3                   | 1110.3                  | 1119.3                   | 556.0                  | ND    | 558.7         | 0.1   | 559.2         | ND    | 559.1         | 0.0   | 560.0                            | 0.2   | 5.9             | 0.3   | 7.2  | ND                              | 7.0  | 0.1   | 65.8                   | 3.3          | 79.9               | ND           | 78.0 | 1.2                | 14.1         | 1.9             | 8.0             | A                           |
| hI-hI1*             | 304-317  | GQLGITVFESNGAD                   | 2.74               | 8.01            | 2 | 13             | 704.3                  | 711.3                   | 1406.6                  | 1419.6                   | 704.2                  | 0.1   | 706.6         | 0.1   | 706.7         | 0.1   | 706.5         | 0.0   | 708.6                            | 0.3   | 7.0             | 0.3   | 7.4  | 0.4                             | 6.6  | ND    | 53.9                   | 2.1          | 56.7               | 3.3          | 51.1 | ND                 | 2.9          | 5.7             | 4.3             | B                           |
| thI1s5A-s5A*        | 318-338  | LSGVTEEAPLKSVAHKAVL              | 4.32               | 8.07            | 4 | 19             | 548.7                  | 553.5                   | 2190.6                  | 2209.6                   | 548.7                  | ND    | 550.5         | 0.3   | 550.5         | 0.0   | 550.3         | 0.1   | 552.2                            | 0.2   | 9.9             | 1.5   | 10.1 | 0.1                             | 8.8  | 0.3   | 52.3                   | 7.6          | 53.2               | 0.4          | 46.1 | 1.8                | 0.9          | 7.1             | 4.0             | B                           |
| s5A*                | 325-338  | APLKSVAHKAVL                     | 2.97               | 4.85            | 3 | 12             | 492.6                  | 496.6                   | 1474.9                  | 1486.9                   | 492.6                  | ND    | 493.8         | 0.1   | 493.6         | 0.1   | 493.3         | 0.2   | 495.4                            | 0.2   | 5.4             | 0.6   | 4.2  | 0.7                             | 3.1  | 0.8   | 45.2                   | 4.9          | 34.9               | 5.4          | 25.9 | 6.7                | -10.3        | 8.9             | -               | C                           |
| s5A-RSL             | 339-351  | TIDEKGEAAGAM                     | 2.02               | 4.70            | 2 | 12             | 647.7                  | 653.6                   | 1293.4                  | 1305.4                   | 647.7                  | 0.1   | 651.2         | 0.1   | 651.5         | 0.1   | 651.4         | 0.1   | 652.1                            | 0.5   | 9.5             | 0.3   | 10.4 | 0.2                             | 10.0 | 0.4   | 78.8                   | 2.9          | 86.5               | 1.9          | 83.  |                    |              |                 |                 |                             |

<sup>a</sup> The nomenclature of Huber and Carrell was followed (1).

<sup>b</sup> Searched scores by SEQUEST searching algorithm.

<sup>c</sup> Retention time (min)

<sup>d</sup> The number of theoretically exchangeable amide hydrogen. Proline residue has no exchangeable amide hydrogen on peptide bond.

<sup>e</sup> The deuterium content,  $D$  in each fragment was calculated from  $D = N \cdot (m_t - m_{0\%}) / (m_{100\%} - m_{0\%})$ , where  $m_t$  is the experimentally determined mass,  $m_{0\%}$  is the average mass of 0% deuterium control, and  $m_{100\%}$  represents the average mass of the 100% deuterium control (2).  $D1$  shows exchanged-deuterium content in native  $\alpha_1AT$ ,  $D2$  and  $D3$  show exchanged-deuterium content during complex formation and after complex formation, respectively.

<sup>f</sup>  $D1(\%)$ ,  $D2(\%)$ , and  $D3(\%)$  are portion of H/D-EX relation to the number of theoretically exchangeable amide hydrogen in each peptic fragment, for instance,  $D2(\%) = D2 / N \times 100$ .  $D2(\%) - D1(\%)$  or  $D2(\%) - D3(\%)$  indicates the difference in percent exchange for D2-specific relation to D1 to D3

<sup>g</sup> Average of percentage differences for D2-specific H/D-EX, that is average of  $D2(\%) - D1(\%)$  and  $D2(\%) - D3(\%)$ .

<sup>h</sup> Each group (A~D) was categorized according to the pattern of H/D-EX for D1-D2-D3. The groups are the same as in Fig 5.

\* Representative 23 peptic fragments that provide details of structural changes for most secondary structures were selected.

ND: error not determined for single measurement

Note that average of percent change error (n=2) in 39 common peptic fragments was  $\pm 4.36\%$  (D1,  $\pm 5.21\%$ ; D2,  $\pm 3.24\%$ ; D3,  $\pm 4.62\%$ ).

## References

1. Huber, R. & Carrell, R. W. (1989) *Biochemistry* 28, 8951-8966.
2. Smith, D. L., Deng, Y., & Zhang, Z. (1997) *J Mass Spectrom* 32, 135-146.
